# Supplementary material for: Metal Ion-Chelated Tannic Acid Coating for Hemostatic Dressing
Source: Materials (Basel). 2019 Jun 3;12(11):1803. doi: 10.3390/ma12111803 (PMC6600752; doi:10.3390/ma12111803)
Supplement: Supplementary file 1 [file materials-12-01803-s001.pdf]

Supporting information for

# **Metal Ion-Chelated Tannic Acid Coating for Hemostatic Dressing**

**Bing Song<sup>1</sup>, Liwei Yang<sup>1</sup>, Lulu Han<sup>1,\*</sup> and Lingyun Jia<sup>1</sup>**

<sup>1</sup> Liaoning Key Laboratory of Molecular Recognition and Imaging, School of Bioengineering, Dalian

University of Technology, Dalian 116023, PR China; songbing@mail.dlut.edu.cn(B. S.);

yanglw@mail.dlut.edu.cn(L. Y.); luluhan@dlut.edu.cn (L. H.); lyjia@dlut.edu.cn(L. J.)

\* Correspondence: luluhan@dlut.edu.cn; Tel.: +86-411-84706316

Received: date; Accepted: date; Published: date

# Table of Contents

|                                                                                                            |   |
|------------------------------------------------------------------------------------------------------------|---|
| Table S1. Physicochemical properties of the three model proteins and their coupling efficiency with FITC.. | 4 |
| Figure S1. Absorption spectrum of three FITC labeled proteins.                                             | 5 |
| Figure S2. Fluorescence intensity of model protein adsorption on the TA coated-silicon slide.              | 6 |

## Preparation of Fluorescently Labeled Proteins

Labeling of bovine serum albumin (BSA), human Immunoglobulin G (IgG) and fibrinogen (Fgn) with fluorescein isothiocyanate (FITC) was performed according to the instruction of the FITC manufacturer. Briefly, FITC was dissolved in anhydrous DMSO at 1 mg mL<sup>-1</sup>, and a solution of 2 mg mL<sup>-1</sup> of protein in 0.1 M sodium carbonate buffer, pH 9.8 was prepared. For each 1 mL of protein solution, 50 µL of FITC solution was added slowly, while gently and continuously stirring the protein solution. The reaction was incubated in the dark for 12 h at 4 °C. Afterwards, excess FITC was removed by dialysis membrane (7 kDa).

The ratio of fluorescein to protein (F/P) of the product was estimated by measuring the absorbance at 498 nm and 280 nm via a UV spectrophotometer (Figure S1). The F/P molar ratio is defined as the ratio of moles of FITC to moles of protein in the conjugate. It was calculated from the following formulas:

$$\text{Molar } F / P = \frac{MW}{389} \times \frac{A_{498} E^{0.1\%}}{195[A_{280} - (0.35 \times A_{498})]}$$

Where, MW is molecular weight of the protein; E<sup>0.1%</sup> is the absorption at 280 nm of a protein at 1.0 mg mL<sup>-1</sup>; A<sub>280</sub> and A<sub>498</sub> is the absorbance of the conjugate sample at 280 nm and 498 nm, respectively.

**Table S1.** Physicochemical properties of the three model proteins and their coupling efficiency with FITC. MW: molecular weight; pI: isoelectric point; F/P molar ratio: the ratio of mole of FITC to mole of protein in the conjugate.

| Protein                      | BSA                            | IgG          | Fgn                       |
|------------------------------|--------------------------------|--------------|---------------------------|
| MW(kDa)                      | 66                             | 150          | 340                       |
| pI                           | 4.6                            | 8.6          | 5.6                       |
| F/P molar ratio              | 3                              | 3            | 2                         |
| Shape                        | Prism shape                    | Sphere       | Cylinder                  |
| Dimensions (nm)              | 4.0*4.0*14.0                   | 6.6*7.7*10.1 | diameter 6.5, length 47.5 |
| Plasma concentration (mg/mL) | 40                             | 6.5-16.5     | 2.0-4.0                   |
| PDB ID                       | HSA : 1E78<br>Not find yet BSA | 1IGT         | 3GHG                      |

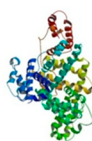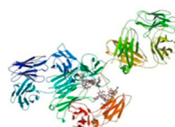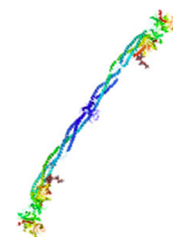

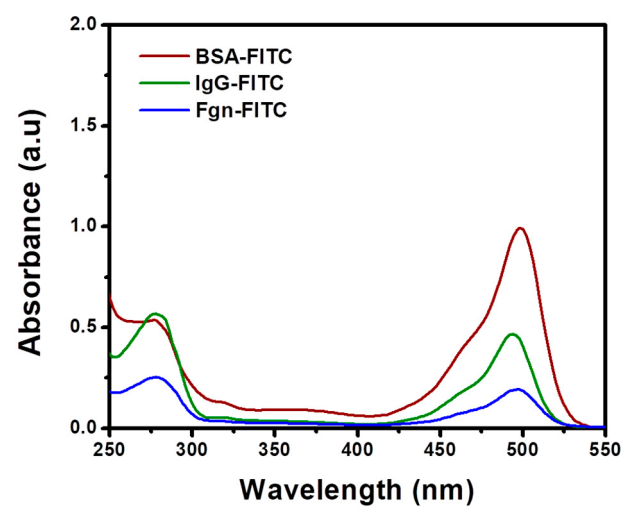

**Figure S1.** Absorption spectrum of three FITC labeled proteins.

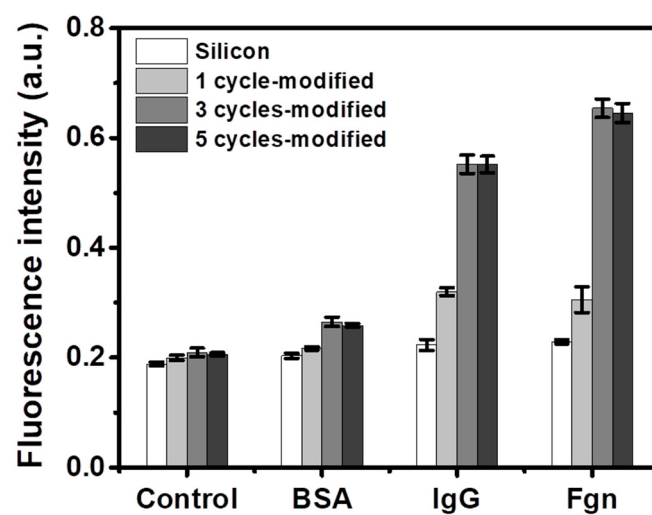

**Figure S2.** Fluorescence intensity of model protein adsorption on the TA coated-silicon slide.
